# Supplementary material for: The Effect of Cell-Free Nontuberculous Mycobacterium Supernatants on Antibiotic Resistance and Biofilm Formation of Opportunistic Pathogens
Source: MDPI journal article supplement (doi:10.3390/bacteria2040013), 2023-12-01
Supplement: s1 [file s1]

The ability of biofilm formation was calculated using the given formula relative to the optical density of solutions in (%). The average OD values are presented in the table.

Table S1: Average optical densities of test and control samples.

| <i>E. coli</i> IKVS 1         |                   |                                |                   |
|-------------------------------|-------------------|--------------------------------|-------------------|
| <i>M. iranicum</i><br>IKVS S1 | OD<br>0,190±0,003 | <i>M. iranicum</i><br>IKVS S 2 | OD<br>0,178±0,003 |
| Control                       | 0,144±0,002       | Control                        | 0,153±0,002       |
| <i>E. coli</i> IKVS 18        |                   |                                |                   |
| <i>M. iranicum</i><br>IKVS S1 | OD<br>0,177±0,003 | <i>M. iranicum</i><br>IKVS S 2 | OD<br>0,163±0,003 |
| Control                       | 0,147±0,002       | Control                        | 0,149±0,002       |
| <i>S. epidermidis</i> IKVS 7  |                   |                                |                   |
| <i>M. iranicum</i><br>IKVS S1 | OD<br>0,223±0,004 | <i>M. iranicum</i><br>IKVS S2  | OD<br>0,219±0,004 |
| Control                       | 0,177±0,003       | Control                        | 0,213±0,003       |
| <i>S. epidermidis</i> IKVS 13 |                   |                                |                   |
| <i>M. iranicum</i><br>IKVS S1 | OD<br>0,273±0,005 | <i>M. iranicum</i><br>IKVS S2  | OD<br>0,269±0,005 |
| Control                       | 0,212±0,003       | Control                        | 0,250±0,004       |
